# Supplementary material for: The Structural Properties of Odorants Modulate Their Association to Human Odorant Binding Protein
Source: PubMed Central journal article supplement (PMC7912024; doi:10.3390/biom11020145), 2021-01-22
Supplement: biomolecules-11-00145-s001.pdf [file biomolecules-11-00145-s001.pdf]

*Supplementary materials*

# The Structural Properties of Odorants Modulate Their Association to Human Odorant Binding Protein

Tarsila G. Castro, Carla Silva, Teresa Matamá and Artur Cavaco-Paulo \*

Centre of Biological Engineering, University of Minho, Campus de Gualtar, 4710-057 Braga, Portugal

\* Correspondence: artur@deb.uminho.pt; Tel.: +351-253-604-409

**Citation:** Castro, T.G.; Silva, C.; Matamá, T.; Cavaco-Paulo, A. The Structural Properties of Odorants Modulate Their Association to Human Odorant Binding Protein. *2021*, *11*, 145. <https://doi.org/10.3390/biom11020145>

Received: 24 November 2020

Accepted: 20 January 2021

Published: 22 January 2021

**Publisher's Note:** MDPI stays neutral with regard to jurisdictional claims in published maps and institutional affiliations.

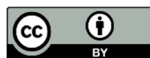

**Copyright:** © 2021 by the authors. Submitted for possible open access publication under the terms and conditions of the Creative Commons Attribution (CC BY) license (<http://creativecommons.org/licenses/by/4.0/>).

**Table S1.** CAS# = chemical abstract service, identification, of each odorant molecule under study.

|           | CAS#        |           | CAS#        |
|-----------|-------------|-----------|-------------|
| <b>1</b>  | 85213-22-5  | <b>31</b> | 4312-99-6   |
| <b>2</b>  | 8000-41-7   | <b>32</b> | 2463-53-8   |
| <b>3</b>  | 502-99-8    | <b>33</b> | 58888-76-9  |
| <b>4</b>  | 140-11-4    | <b>34</b> | 27960-21-0  |
| <b>5</b>  | 123-86-4    | <b>35</b> | 307964-33-6 |
| <b>6</b>  | 76-22-2     | <b>36</b> | 64-19-7     |
| <b>7</b>  | 6485-40-1   | <b>37</b> | 539-86-6    |
| <b>8</b>  | 5392-40-5   | <b>38</b> | 870-23-5    |
| <b>9</b>  | 106-22-9    | <b>39</b> | 7664-41-7   |
| <b>10</b> | 91-64-5     | <b>40</b> | 62-53-3     |
| <b>11</b> | 431-03-8    | <b>41</b> | 100-53-8    |
| <b>12</b> | 97-53-0     | <b>42</b> | 109-79-5    |
| <b>13</b> | 6413-10-1   | <b>43</b> | 462-94-2    |
| <b>14</b> | 706-14-9    | <b>44</b> | 7782-50-5   |
| <b>15</b> | 104-61-0    | <b>45</b> | 67-66-3     |
| <b>16</b> | 106-24-1    | <b>46</b> | 676-59-5    |
| <b>17</b> | 24851-98-7  | <b>47</b> | 7783-06-4   |
| <b>18</b> | 123-92-2    | <b>48</b> | 120-72-9    |
| <b>19</b> | 67920-63-2  | <b>49</b> | 503-74-2    |
| <b>20</b> | 5989-27-5   | <b>50</b> | 74-93-1     |
| <b>21</b> | 126-91-0    | <b>51</b> | 593-54-4    |
| <b>22</b> | 55066-48-3  | <b>52</b> | 7697-37-2   |
| <b>23</b> | 2216-51-5   | <b>53</b> | 10102-44-0  |
| <b>24</b> | 623-42-7    | <b>54</b> | 7803-51-2   |
| <b>25</b> | 123-35-3    | <b>55</b> | 79-09-4     |
| <b>26</b> | 80-56-8     | <b>56</b> | 110-60-1    |
| <b>27</b> | 357650-26-1 | <b>57</b> | 83-34-1     |
| <b>28</b> | 89-82-7     | <b>58</b> | 4756-05-2   |
| <b>29</b> | 65113-99-7  | <b>59</b> | 108-88-3    |
| <b>30</b> | 121-33-5    | <b>60</b> | 75-50-3     |

**Table S2.** Comparison of the two independent groups of selected pleasant and unpleasant odorant molecules regarding the six physicochemical properties under study. Results of the nonparametric Mann-Whitney U-test procedure for each property are presented for a level of significance of 0.05.

|                                               | Pleasant odorants |              |    | Unpleasant odorants |              |    | Mann-Whitney U test results |              |                       |
|-----------------------------------------------|-------------------|--------------|----|---------------------|--------------|----|-----------------------------|--------------|-----------------------|
|                                               | Median            | Sum of ranks | n  | Median              | Sum of ranks | n  | U                           | p value      | ES ( $ z /\sqrt{N}$ ) |
| <b>MW</b>                                     | <b>152,24</b>     | 1281,5       | 30 | <b>89,165</b>       | 548,5        | 30 | 83,5                        | $p < 0.0001$ | 0,70                  |
| <b>logP</b>                                   | <b>2,69</b>       | 1197         | 30 | <b>0,875</b>        | 633          | 30 | 168                         | $p < 0.0001$ | 0,54                  |
| <b>Vp</b>                                     | <b>0,1075</b>     | 676          | 30 | <b>22,065</b>       | 1154         | 30 | 211                         | $p < 0.001$  | 0,46                  |
| <b>N°DB</b>                                   | <b>2</b>          | 1115         | 30 | <b>1</b>            | 715          | 30 | 250                         | $p < 0.01$   | 0,38                  |
| <b>DoU</b>                                    | <b>3</b>          | 1174         | 30 | <b>0,75</b>         | 656          | 30 | 191                         | $p < 0.001$  | 0,49                  |
| <b><math>\Delta G_{\text{binding}}</math></b> | <b>-5,75</b>      | 579          | 30 | <b>-3,15</b>        | 1251         | 30 | 114                         | $p < 0.0001$ | 0,64                  |

**Table S3.**  $\Delta G_{\text{binding}}$  (kcal/mol) of the 60 odorants molecules complexed to hOPB from 4RUN X-ray structure. Comparing the ranked  $\Delta G_{\text{binding}}$  values obtained for 4RUN structure, here described, with the ones obtained for the MD simulation of hOBP, either for the pleasant group of odorants (Table 1) or the unpleasant group (Table2), the Mann-Whitney U test shows no significant difference between the two structures ( $U= 423$ ,  $n_1=30$ ,  $n_2 = 30$ ,  $p>0.05$  for the pleasant group of odorants;  $U= 422.5$ ,  $n_1=30$ ,  $n_2 = 30$ ,  $p>0.05$  for the unpleasant group of odorants).

| $\Delta G_{\text{binding}}$ (kcal/mol) |      | $\Delta G_{\text{binding}}$ (kcal/mol) |      |
|----------------------------------------|------|----------------------------------------|------|
| 1                                      | -4,7 | 31                                     | -4,8 |
| 2                                      | -5,5 | 32                                     | -5,5 |
| 3                                      | -5,8 | 33                                     | -4,6 |
| 4                                      | -5,9 | 34                                     | -5,1 |
| 5                                      | -4,3 | 35                                     | -4,3 |
| 6                                      | -6,7 | 36                                     | -3,3 |
| 7                                      | -6,0 | 37                                     | -3,9 |
| 8                                      | -5,8 | 38                                     | -2,9 |
| 9                                      | -5,7 | 39                                     | -1,3 |
| 10                                     | -6,8 | 40                                     | -4,7 |
| 11                                     | -4,1 | 41                                     | -4,8 |
| 12                                     | -5,9 | 42                                     | -3,4 |
| 13                                     | -4,8 | 43                                     | -4,1 |
| 14                                     | -5,5 | 44                                     | -2,1 |
| 15                                     | -5,4 | 45                                     | -3,3 |
| 16                                     | -5,7 | 46                                     | -1,9 |
| 17                                     | -5,9 | 47                                     | -0,8 |
| 18                                     | -4,9 | 48                                     | -5,7 |
| 19                                     | -5,6 | 49                                     | -4,7 |
| 20                                     | -5,5 | 50                                     | -1,3 |
| 21                                     | -5,2 | 51                                     | -1,4 |
| 22                                     | -6,1 | 52                                     | -3,1 |
| 23                                     | -5,0 | 53                                     | -2,9 |
| 24                                     | -4,3 | 54                                     | -0,8 |
| 25                                     | -5,7 | 55                                     | -3,9 |
| 26                                     | -6,3 | 56                                     | -3,8 |
| 27                                     | -5,7 | 57                                     | -5,7 |
| 28                                     | -5,5 | 58                                     | -3   |
| 29                                     | -6,1 | 59                                     | -5,1 |
| 30                                     | -5,5 | 60                                     | -2,5 |

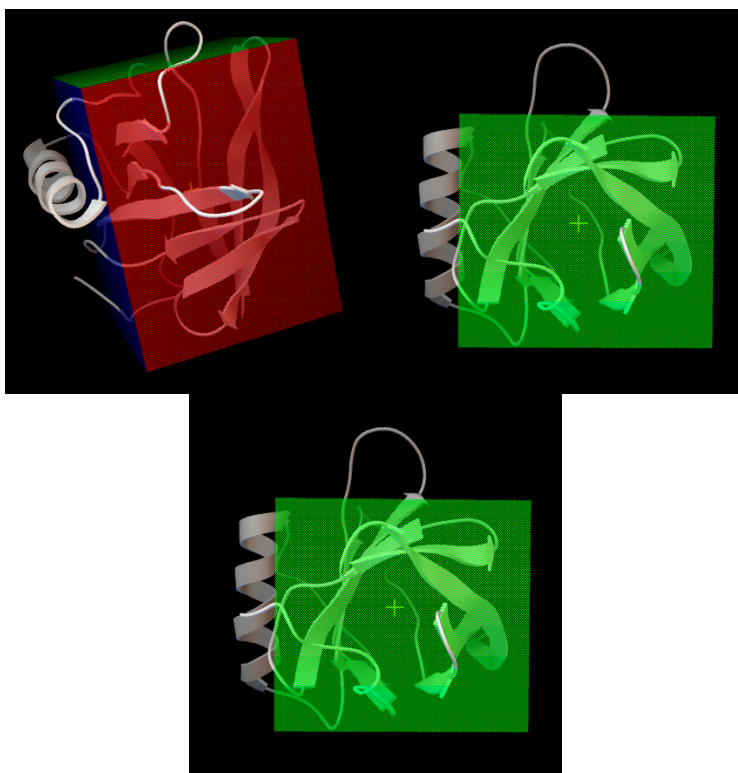

**Figure S1.** Snapshot of Vina grid box, in different perspectives, encompassing the entire beta barrel and its extremities (loops and bends).

CLUSTAL O(1.2.4) multiple sequence alignment

```

4RUN_1|Chains          -----EDITGWTWYVKAMVVDKDFPEDRRPKVSPVKVTALGGGNLEATFTFMREDRCI 53
sp|Q9NY56|OBP2A_HUMAN  LSFLEEEDITGWTWYVKAMVVDKDFPEDRRPKVSPVKVTALGGGNLEATFTFMREDRCI 60
                        *****

4RUN_1|Chains          QKKILMRKTEEPGKFSAYGGRKLIYLQELPGTDDYVFYSKDQRRGGLRYMGNLVGRNPNT 113
sp|Q9NY56|OBP2A_HUMAN  QKKILMRKTEEPGKFSAYGGRKLIYLQELPGTDDYVFYCKDQRRGGLRYMGNLVGRNPNT 120
                        *****

4RUN_1|Chains          NLEALEEFKKLQVQHKGLSEEDIFMPLQTGSCVLEHHHHHHH 154
sp|Q9NY56|OBP2A_HUMAN  NLEALEEFKKLQVQHKGLSEEDIFMPLQTGSCVLEH----- 155
                        *****
    
```

**Figure S2.** Alignment from Clustal Omega (<https://www.ebi.ac.uk/Tools/msa/clustalo/>) between hOBP 4RUN X-ray structure and the full canonical sequence in UniProt.

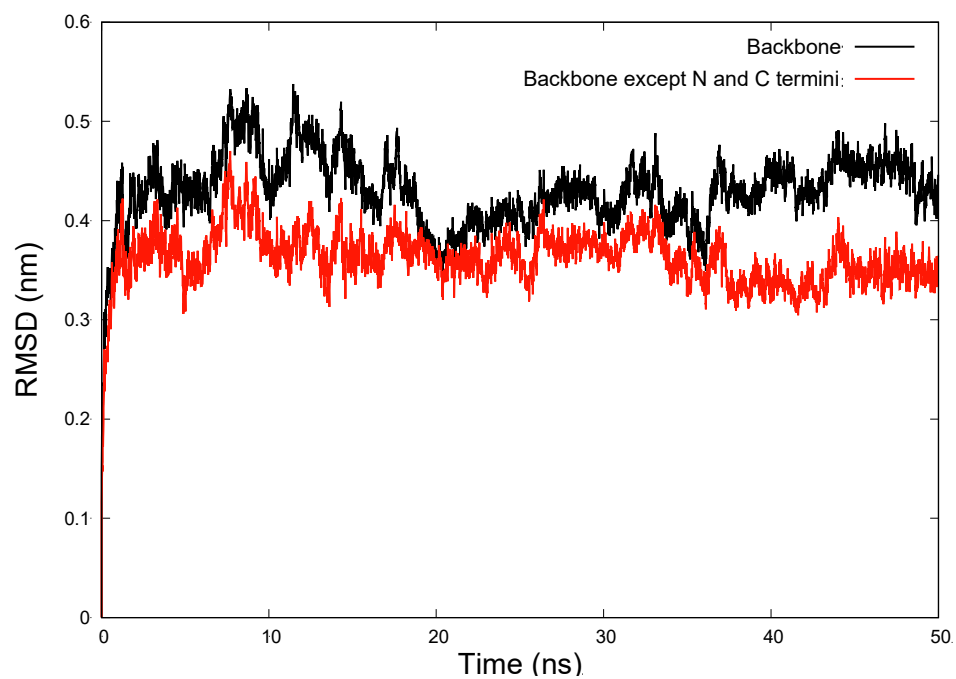

**Figure S3.** Backbone Root Mean Square Deviation (RMSD) of 50 ns MD simulation of hOBP. Black trace considering the backbone of all amino acid residues and red trace disregarding the N and C termini.

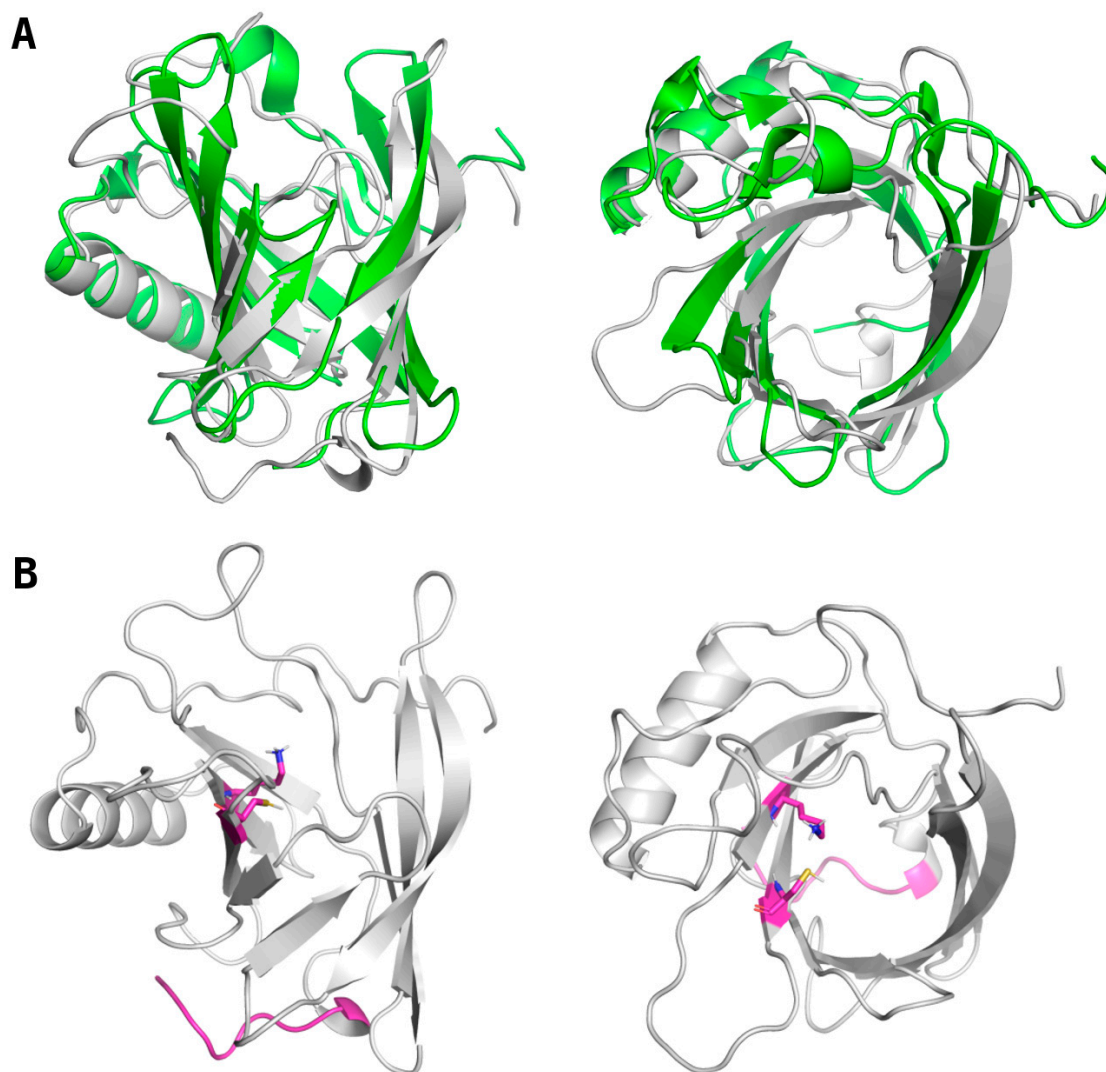

**Figure S4.** (A) Cartoon alignment superposition of 4RUN X-ray structure, in green, over modelled middle structure, in grey. (B) Middle structure, from MD simulations, highlighting in magenta the modelled N-terminal portion and the 2 distinct amino acids, at the barrel core, which in this most frequent conformation have the side chains facing the interior.



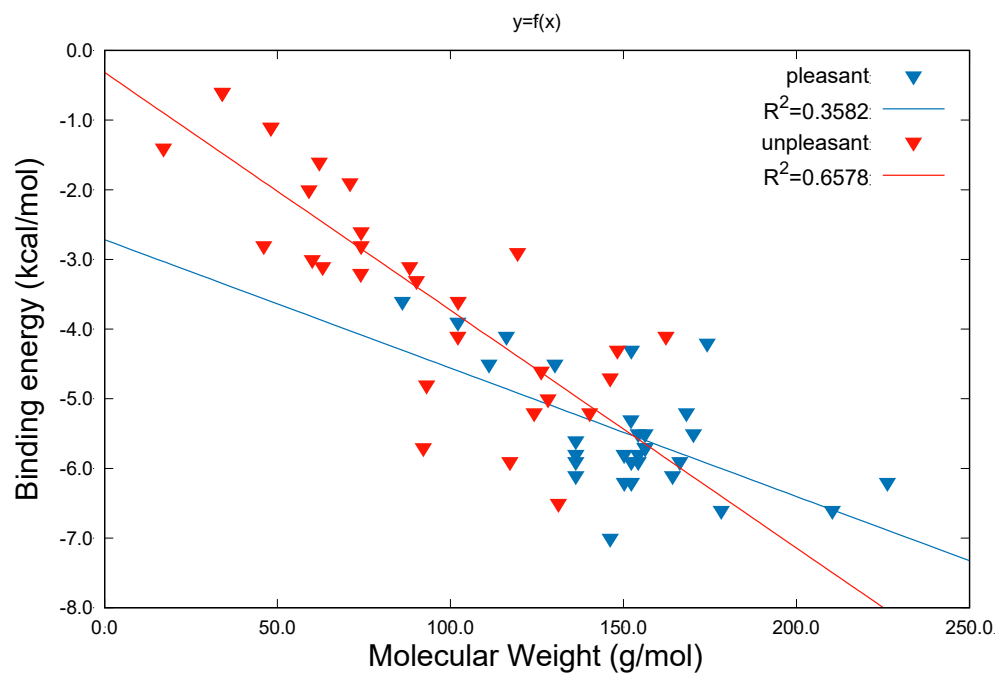

**Figure S5.** Scatter plot of binding energy versus MW, considering the 30 pleasant and the 30 unpleasant odorant molecules. The solid line represents the regression line calculated for the linear correlation between the variables.

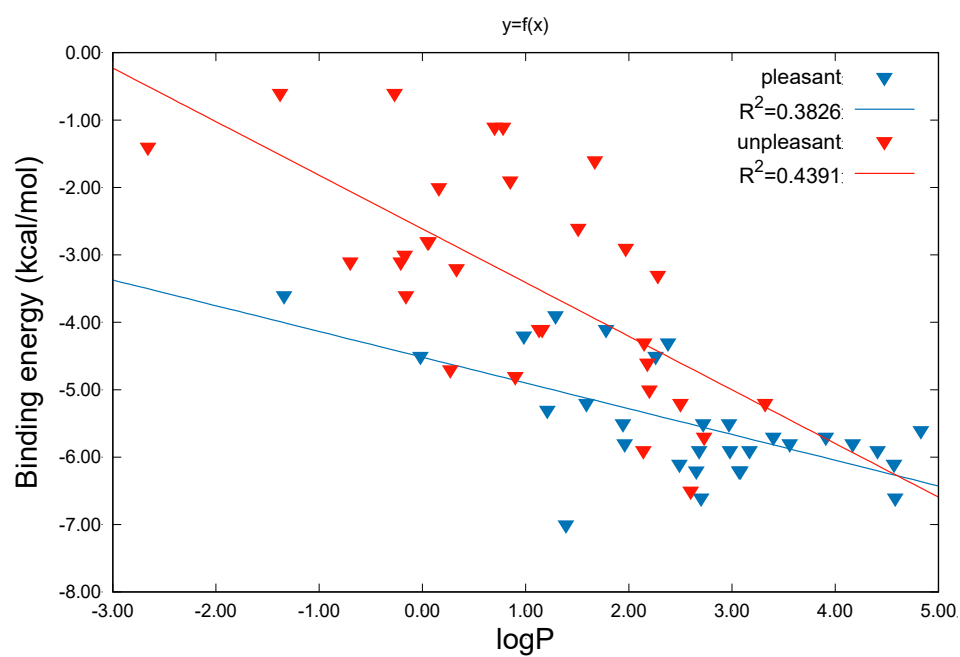

**Figure S6.** Scatter plot of binding energy versus logP, considering the 30 pleasant and the 30 unpleasant odorant molecules. The solid line represents the regression line calculated for the linear correlation between the variables.

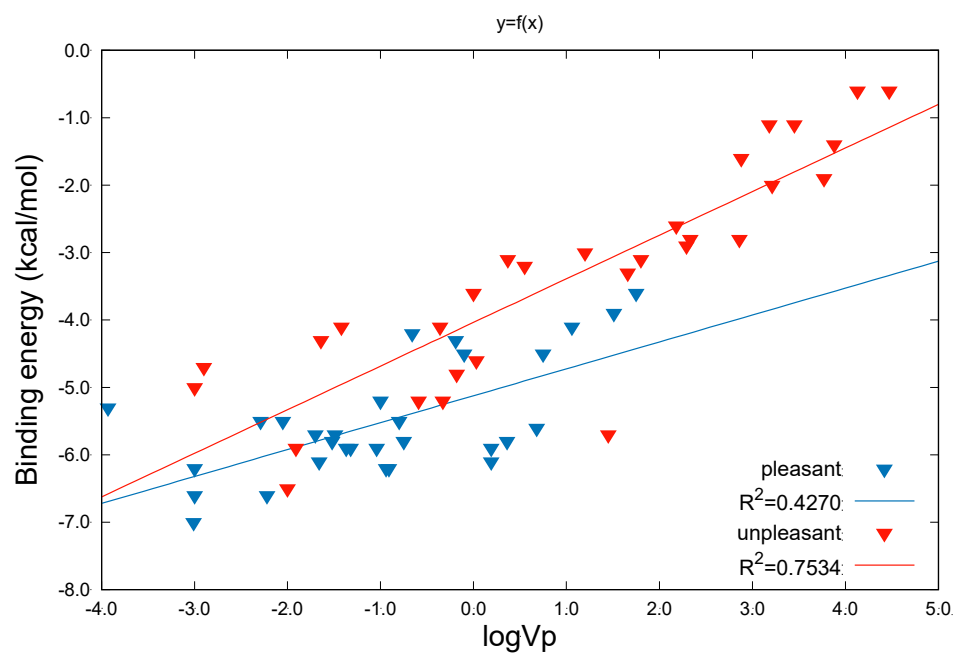

**Figure S7.** Scatter plot of binding energy versus logVp, considering the 30 pleasant and the 30 unpleasant odorant molecules. The solid line represents the regression line calculated for the linear correlation between the variables.

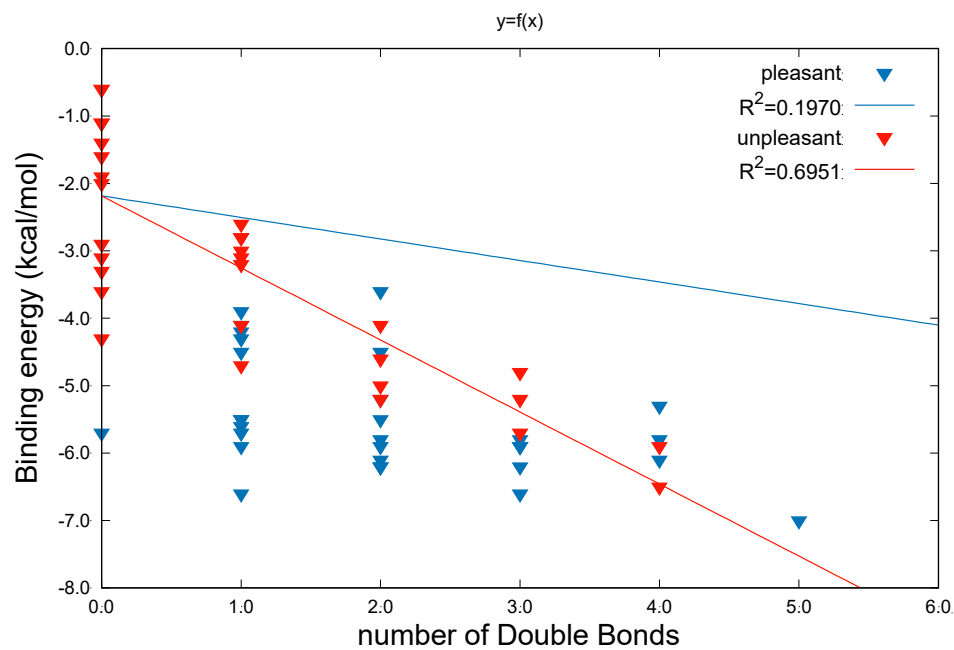

**Figure S8.** Scatter plot of binding energy versus n°DB, considering the 30 pleasant and the 30 unpleasant odorant molecules. The solid line represents the regression line calculated for the polynomial correlation between the variables.

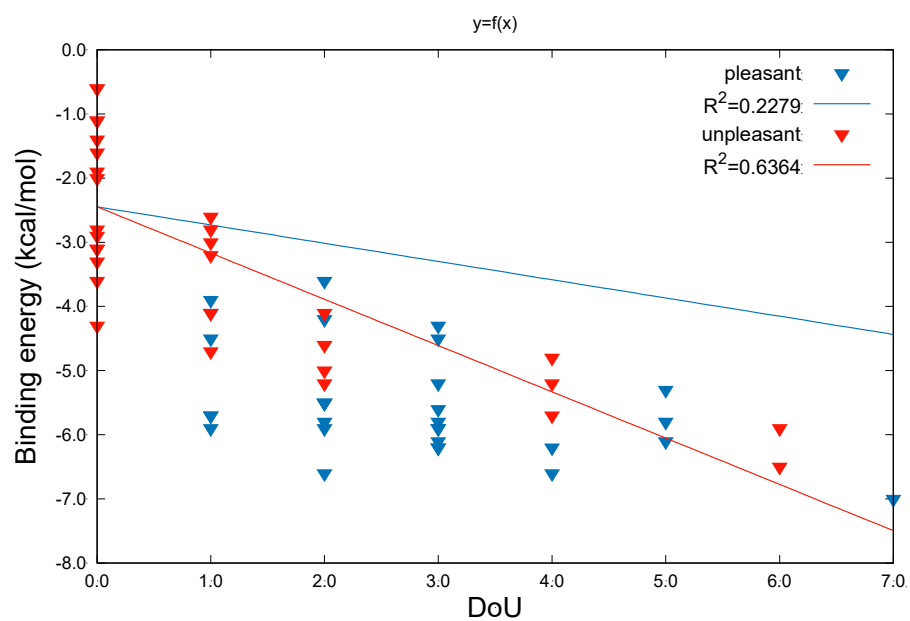

**Figure S9.** Scatter plot of binding energy versus Degree of Unsaturation, considering the 30 pleasant and the 30 unpleasant odorant molecules. The solid line represents the regression line calculated for the polynomial correlation between the variables.
